# Supplementary material
Source: publisher site journal article supplement (https://www.dovepress.com/article/340794)
Supplement: Supplementary file 1 [file get_supplementary_file.php]

**Supplementary Materials**

**Table S1** Patients’ COPD Characteristics Reported by Physicians, According to the Class Of COPD TreatmentReceived

| **Characteristic** | **ICS/LABA only**  **N = 213** | **LAMA only**  **N = 104** | **LABA/LAMA only**  **N = 109** | **ICS/LABA + LAMA**  **only**  **N = 117** | **ICS/LABA/LAMA only**  **N = 84** |
| --- | --- | --- | --- | --- | --- |
| Number of exacerbations in last 12 months   Mean (SD) | 0.8 (1.1) | 0.60 (0.7) | 0.60 (0.8) | 1.30 (1.4) | 1.50 (1.3) |
| COPD is main health concern, *n* (%) | 145 (68.1) | 64 (61.5) | 78 (71.6) | 90 (76.9) | 64 (76.2) |
| Most recent post-bronchodilator FEV1 predicted scorea | *N* = 88 | *N* = 49 | *N* = 62 | *N* = 74 | *N* = 63 |
| Mean (SD) | 71.6 (17.5) | 68.9 (22.4) | 68.1 (17.9) | 51.0 (21.8) | 51.8 (19.6) |
| Most recent blood eosinophil counta | *N* = 37 | *N* = 19 | *N* = 22 | *N* = 28 | *N* = 23 |
| Mean cells/μL (SD) | 316.7 (235.5) | 235.7 (175.2) | 174.6 (101.1) | 212.7 (216.4) | 179.5 (148.1) |
| Symptoms during past 4 weeks, *n* (%) |  |  |  |  |  |
| No symptoms | 25 (11.7) | 8 (7.7) | 17 (15.6) | 2 (1.7) | 1 (1.2) |
| Shortness of breath when resting | 41 (19.3) | 10 (9.6) | 13 (11.9) | 37 (31.6) | 29 (34.5) |
| Shortness of breath during exertion/exercise | 120 (56.3) | 60 (57.7) | 76 (69.7) | 86 (73.5) | 65 (77.4) |
| Shortness of breath when exposed to trigger | 61 (28.6) | 28 (26.9) | 23 (21.1) | 39 (33.3) | 22 (26.2) |
| Wheezing | 76 (35.7) | 34 (32.7) | 29 (26.6) | 52 (44.4) | 40 (47.6) |
| Productive cough/sputum | 94 (44.1) | 34 (32.7) | 33 (30.3) | 60 (51.3) | 40 (47.6) |
| Dry cough | 50 (23.5) | 29 (27.9) | 27 (24.8) | 40 (34.2) | 29 (34.5) |
| Regular clearing of throat | 45 (21.1) | 18 (17.3) | 14 (12.8) | 30 (25.6) | 17 (20.2) |
| A tight feeling in the chest | 43 (20.2) | 15 (14.4) | 20 (18.4) | 28 (23.9) | 19 (22.6) |
| Bronchospasm/sudden chest tightening | 22 (10.3) | 10 (9.6) | 13 (11.9) | 23 (19.7) | 15 (17.9) |
| Fatigue | 49 (23.0) | 22 (21.2) | 18 (16.5) | 53 (45.3) | 35 (41.7) |
| CAT scorea | *N* = 121 | *N* = 48 | *N* = 45 | *N* = 67 | *N* = 50 |
| Mean (SD) | 20.3 (8.1) | 16.5 (8.5) | 17.6 (9.1) | 21.3 (8.5) | 21.1 (9.4) |
| GOLD group, *n* (%)a,b | *N* = 121 | *N* = 48 | *N* = 45 | *N* = 67 | *N* = 50 |
| A | 10 (8.3) | 12 (25.0) | 11 (24.4) | 5 (7.5) | 3 (6.0) |
| B | 57 (47.1) | 24 (50.0) | 23 (51.1) | 25 (37.3) | 12 (24.0) |
| C | 3 (2.5) | 0 (0.0) | 0 (0.0) | 1 (1.5) | 2 (4.0) |
| D | 51 (42.2) | 12 (25.0) | 11 (24.4) | 36 (53.7) | 33 (66.0) |

**Notes:** aN indicates the number of patients with results available for the parameter in each group;bGOLD group derived using exacerbation history and CAT score. The table describes the 5 most commonly prescribed classes of maintenance treatment. Maintenance treatment classes may also include the use of short-acting treatments.

**Abbreviations:** BMI, body mass index; CAT, COPDAssessment Test; COPD, chronic obstructive pulmonary disease; ICS, inhaled corticosteroid; LABA, long-acting β2-agonist; LAMA, long-acting muscarinic antagonist; SD, standard deviation.
